# Supplementary material for: A Genome-Wide Association Study Reveals a Rich Genetic Architecture of Flour Color-Related Traits in Bread Wheat
Source: Front Plant Sci. 2018 Aug 3;9:1136. doi: 10.3389/fpls.2018.01136 (PMC6085589; doi:10.3389/fpls.2018.01136)
Supplement: Supplementary file 6 [file Table_6.XLSX]

## Sheet: Table S6
Table S6 SNP markers corresponding to known genes influencing flour color-related traits
Gene	Enzyme	Genbank No.	SNP Marker	Chr	Physical position (bp)
FPPS2	Farnesyl pyrophosphate synthase 2	JX235715	IACX14	1A	544605206-544605086
			BS00022577_51	1B	615125978-615125878
			IACX1891	1B	615126738-615126860
			RFL_Contig591_125	1B	615127811-615127721
			BS00085823_51	1D	449470270-449470170
			Kukri_c13463_728	1D	449471764-449471852
			BS00085821_51	1D	449470333-449470233
			Excalibur_c36368_166	1D	449472480-449472397
MK	Mevalonate kinase	AFV51837	Excalibur_rep_c102439_226	2A	777288507-777288601
			RAC875_c21269_1225	2B	779856992-779857090
			IACX7717	2B	779856008-779855852
			RFL_Contig5251_896	2D	650862627-650862557
			D_contig36097_218	2Dx	650862664-650862415
GGT I β-subunit	Geranylgeranyl transferase I β-subunit	JV988976	Excalibur_c49977_170	3A	-
FPPS1	Farnesyl pyrophosphate synthase 1	JX235712	wsnp_Ex_c34975_43204180	3B	457976029-457976229
			Ku_c3839_703	3B	-
GGT I α-subunit	Geranylgeranyl transferase I α-subunit	JP222619	wsnp_Ex_c23102_32328852	7A	659371315-659371115
			wsnp_Ex_c23102_32328851	7A	659371316-659371116
			Tdurum_contig61966_1069	7A	659371065-659370965
			Excalibur_c22219_254	7A	659374347-659374247
			BS00093512_51	7A	659370965-659371065
			wsnp_Ku_c60707_62509051	7B	626070463-626070663
			wsnp_Ex_c10550_17231294	7B	626069001-626068801
			Ku_c60707_399	7B	626070471-626070571
CYP97A3	Carotenoid β-ring hydroxylase (Cytochrome P450-type monooxygenase CYP97C1)	JP922105	wsnp_JD_c7795_8868122	6A	606765770-606765839
			wsnp_BF291974A_Ta_2_1	6A	606767291-606767171
			Kukri_c30754_229	6A	606762708-606762608
			GENE-3988_631	6B	704789514-704789606
			Tdurum_contig569_263	6B	704793445-704793345
			GENE-3988_79	6D	460568393-460568489
AO3	Aldehyde oxidase 3	EMS49052	RAC875_c64451_465	7A	696810337-696810260
			Kukri_c55360_910	7A	696809397-696809297
			Kukri_c55360_1138	7A	696809169-696809069
			Kukri_rep_c103039_607	7A	696811454-696811554
			wsnp_Ex_rep_c105131_89643770	7B	687595682-687595882
			wsnp_Ex_rep_c104090_88891443	7B	687593290-687593471
			Excalibur_rep_c104090_439	7B	687593401-687593471
			BS00081841_51	7B	687595832-687595732
			BS00057323_51	7B	687591750-687591650
			RAC875_c15047_109	7B	686151715-686151815
			Kukri_rep_c110445_289	7B	686152274-686152174
			RAC875_c89296_456	7D	604986203-604986303
CAT3	Catalase 3	AKP21078	wsnp_Ku_c28104_38042857	7A	724084903-724084703
			wsnp_JD_c1635_2290177	7A	724085069-724085268
			Excalibur_c62303_444	7B	730151964-730151864
			Excalibur_c62303_51	7B	730152357-730152257
			BS00021979_51	7D	92718067-92718167
POD	Peroxidase	EU725470	Ex_c25423_223	7A	-
			Excalibur_c25423_917	7A	-
			Kukri_c19109_256	7D	262734881-262734807
			BobWhite_c12860_202	7D	262736939-262737034
